# Supplementary material
Source: publisher figshare collection journal article supplement (https://tandf.figshare.com/ndownloader/files/13638695)
Supplement: Supplementary file 1 [file 13638695]

**Supporting information**

**Dipeptide-Modified Nanoparticles to Facilitate Oral Docetaxel Delivery: New Insights into PepT1-Mediated Targeting Strategy**

Yuqian Dua, Chutong Tiana, Menglin Wanga, Di Huangb, Wei Weia, Yan Liua, Lin Lia, Bingjun Suna, Longfa Koua, Qiming Kanc, Kexin Liub, Cong Luoa, Jin Suna,*, Zhonggui Hea,*

*a. Department of Pharmaceutics, Wuya College of Innovation, Shenyang Pharmaceutical University, Shenyang, P.R. China*

*b. Department of Clinical Pharmacology, School of Pharmacy, Dalian Medical University, Dalian, P.R. China*

*c. School of Life Science and Biopharmaceutics, Shenyang Pharmaceutical University, Shenyang, 110016, P. R. China*

*Corresponding author:

Prof. Zhonggui He, PhD and Prof. Jin Sun, PhD

No. 59 Mailbox, Department of Pharmaceutics, Wuya College of Innovation, Shenyang Pharmaceutical University, 103 Wenhua Road, Shenyang 110016, China

Tel: +86-024-23986321; Fax: +86-024-23986321

E-mail address: hezhonggui@vip.163.com; sunjin@syphu.edu.cn


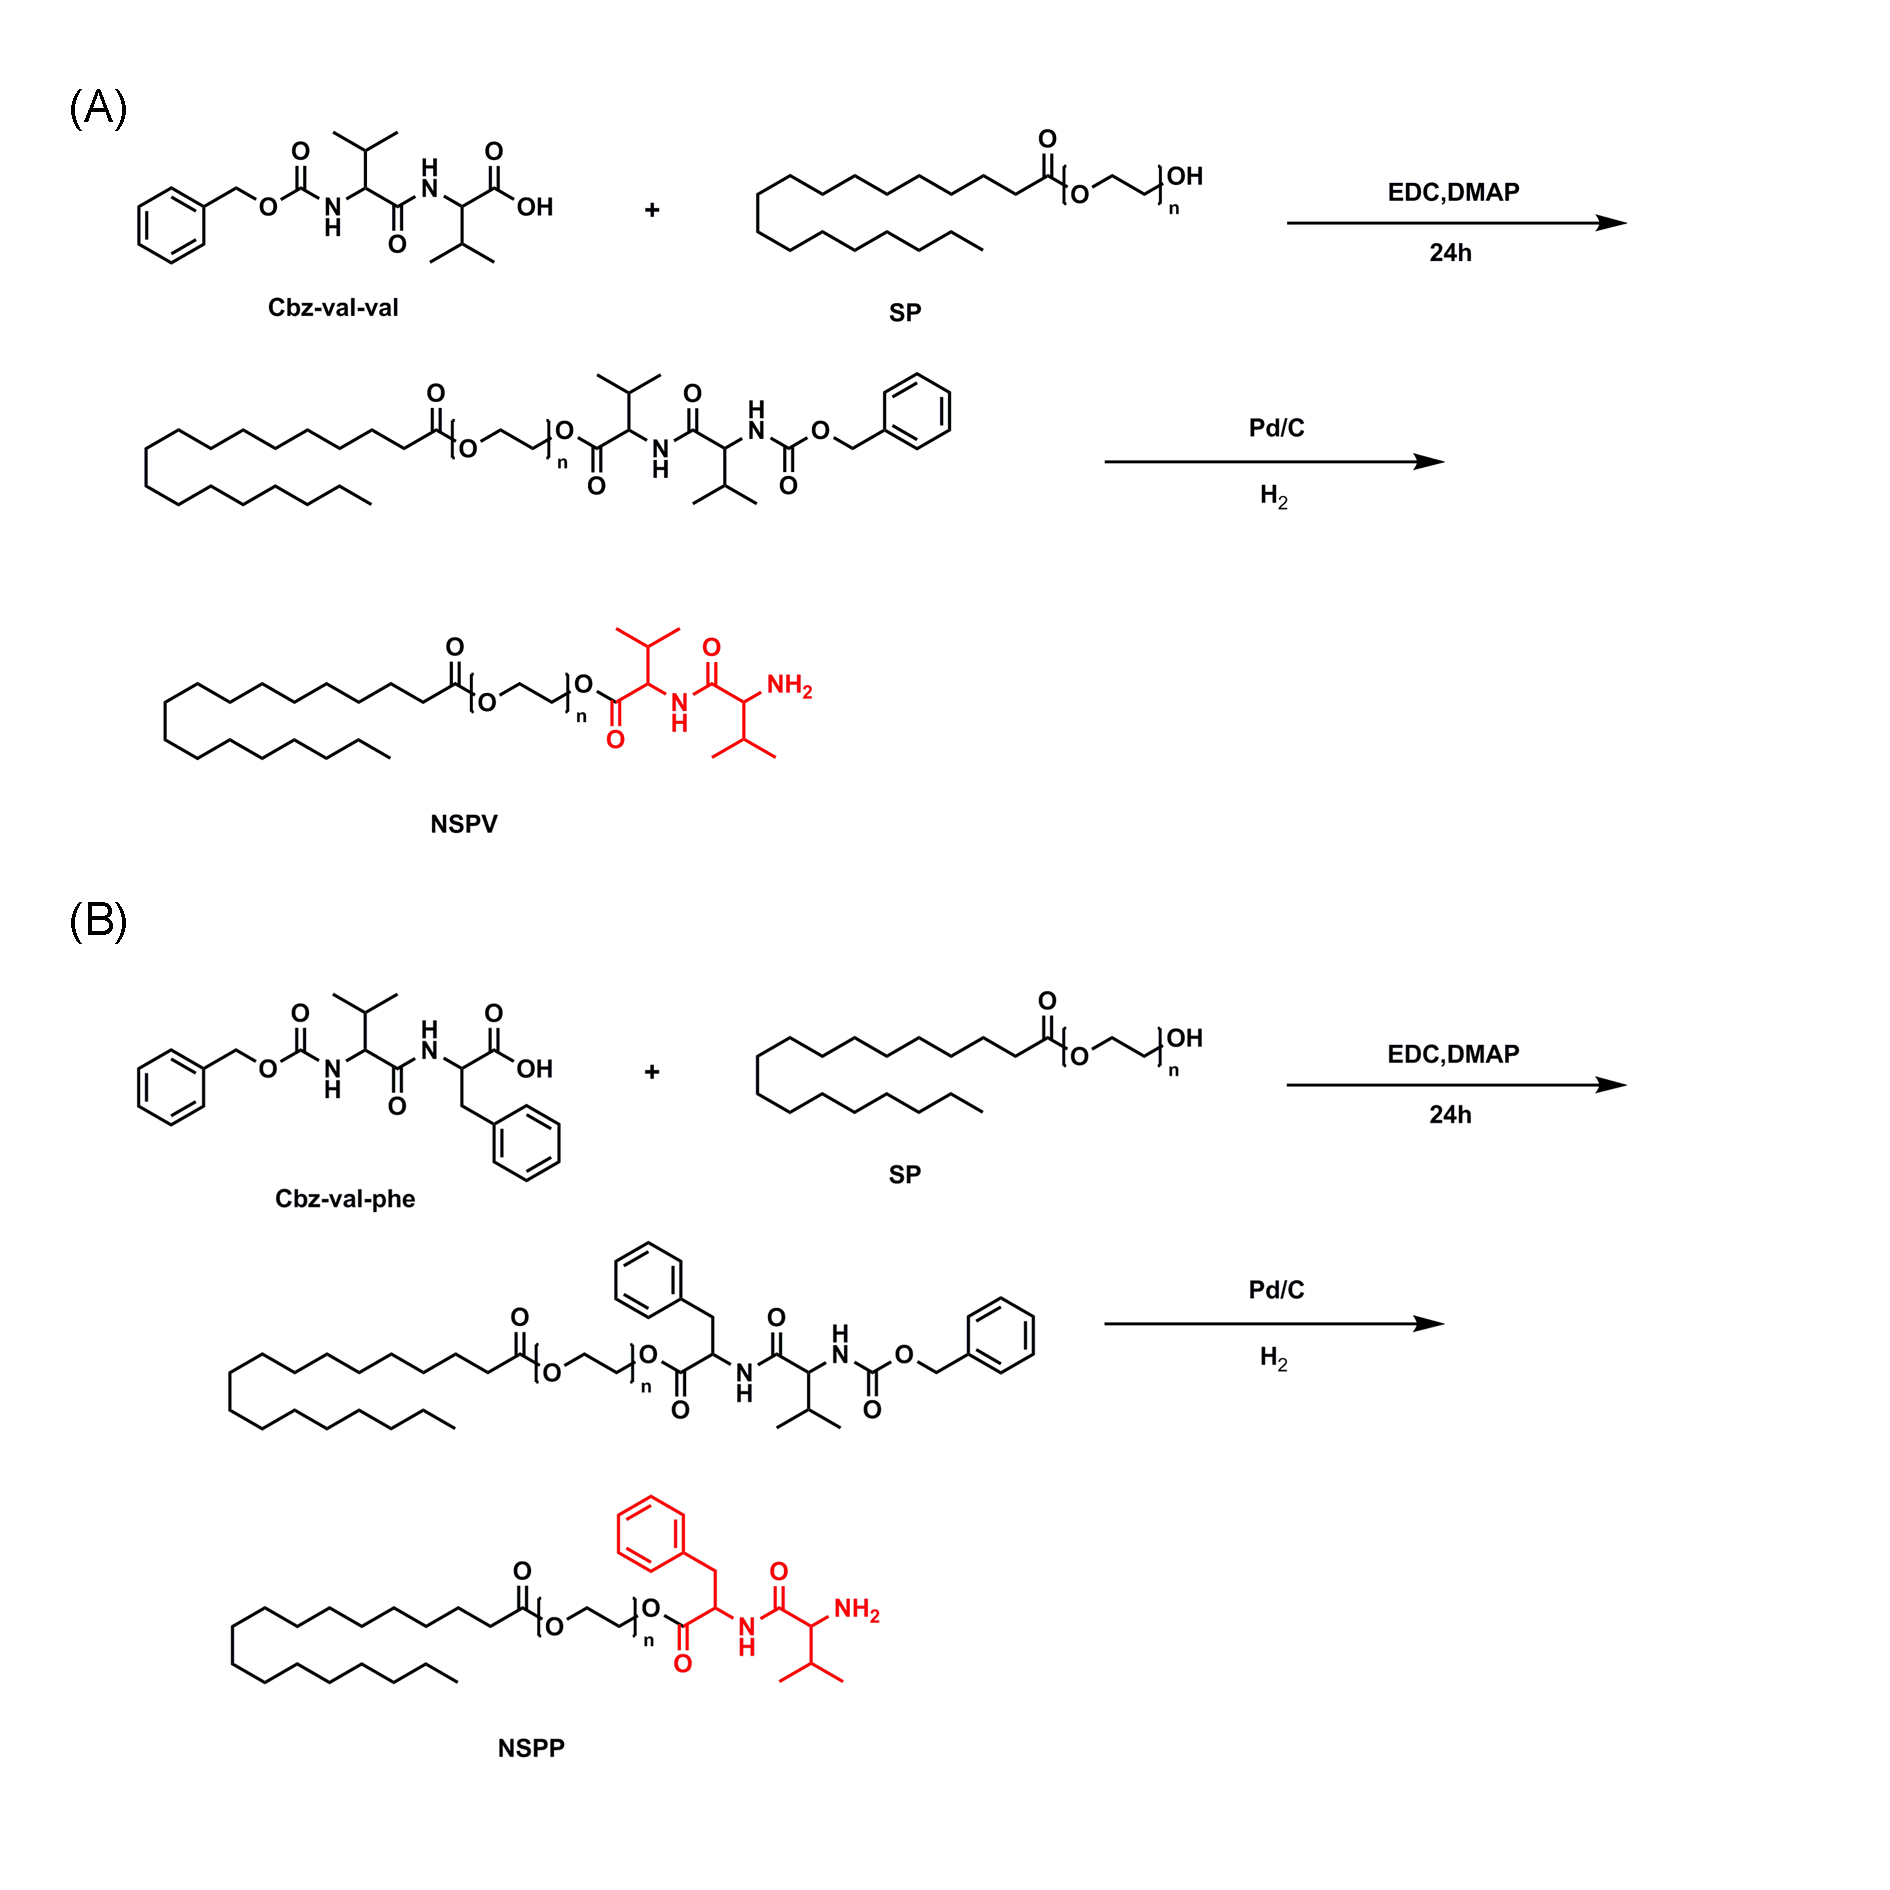


Figure S1. The synthesis routes of dipeptides (L-valine-valine, L-valine-phenylalanine) and polyoxyethylene n stearate (SPn) conjugates (n=25 or 40, representing PEG Mw: 1000 or 2000, respectively).


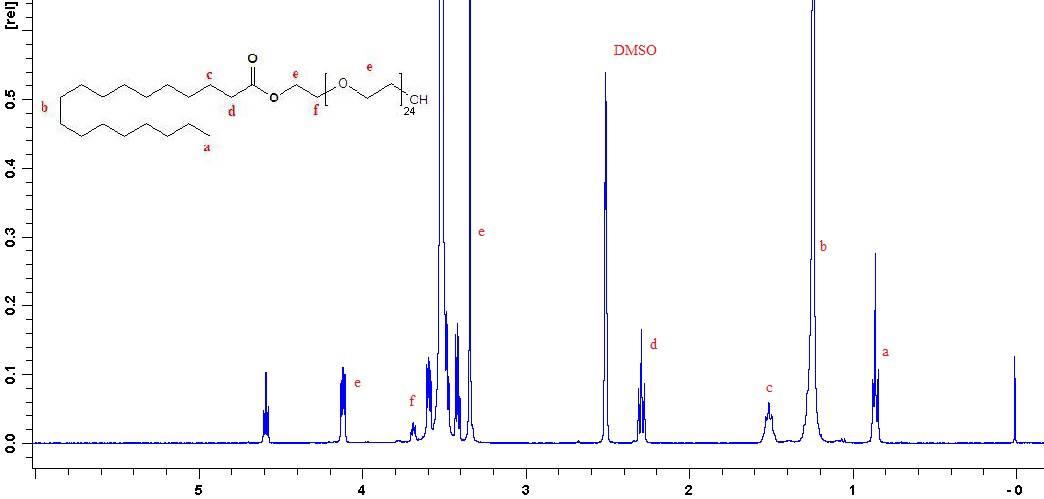


Figure S2. 1H NMR spectrum of polyoxyethylene25 stearate (SP25).


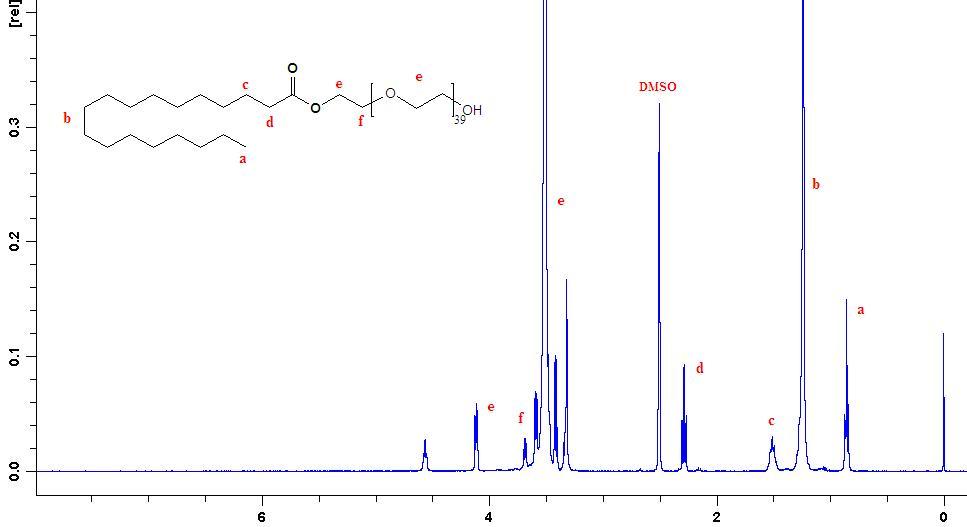


Figure S3. 1H NMR spectrum of polyoxyethylene40 stearate (SP40).


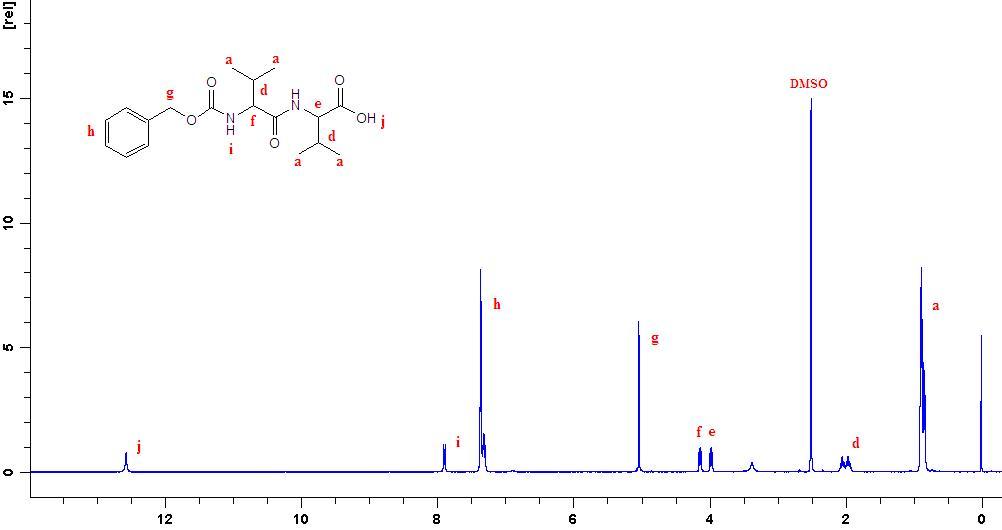


Figure S4. 1H NMR spectrum of Cbz-L-valine-valine.


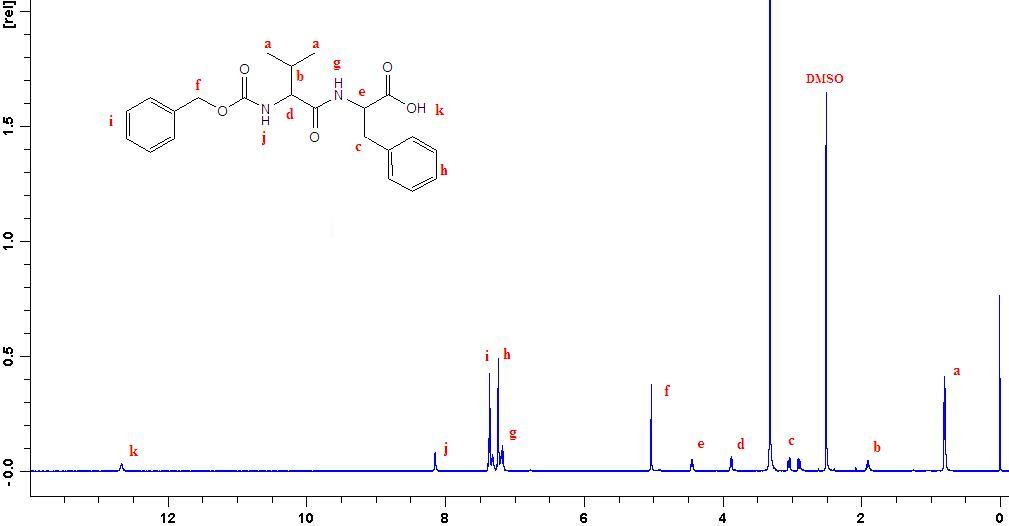


Figure S5. 1H NMR spectrum of Cbz-L-valine-phenylalanine.


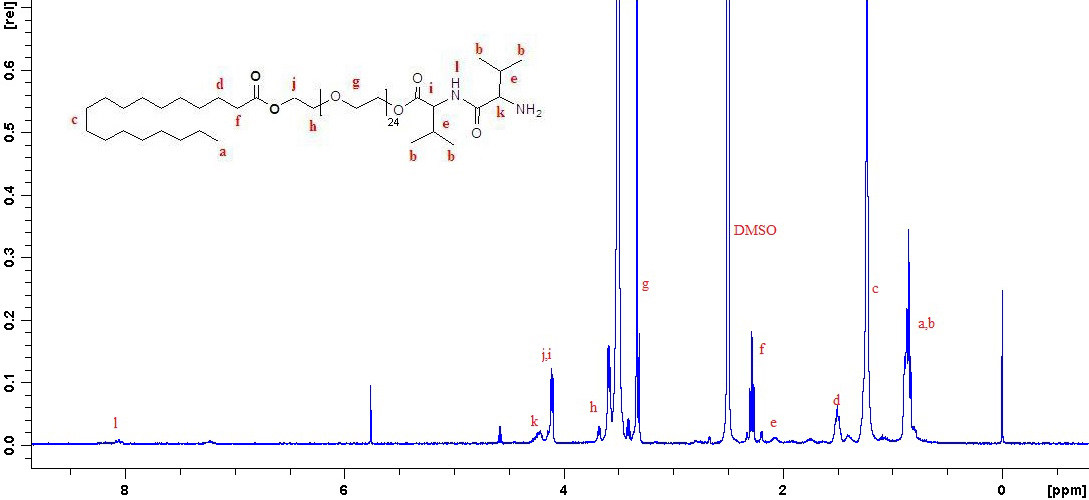


Figure S6. 1H NMR spectrum of NSPV1000 polymer (L-valine-valine and polyoxyethylene25 stearate conjugate, PEG Mw:1000).


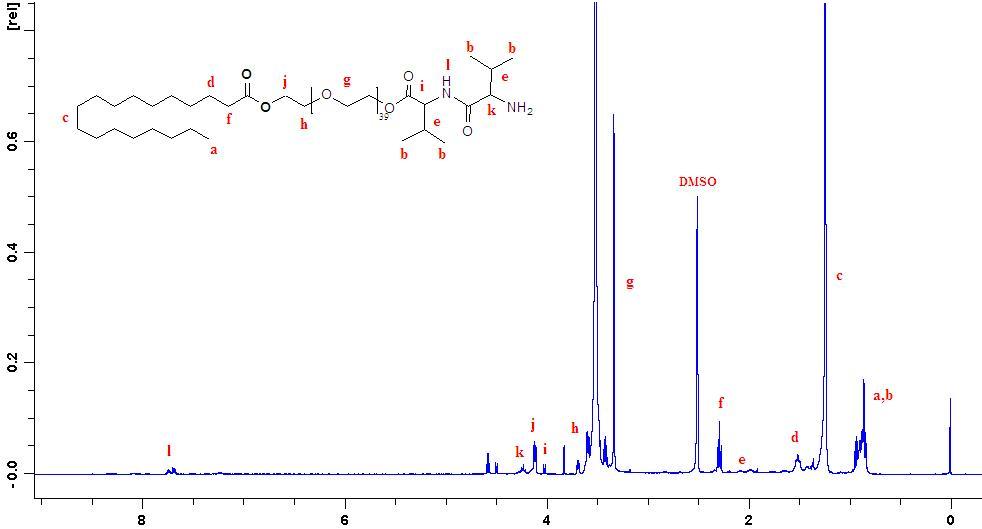


Figure S7. 1H NMR spectrum of NSPV2000 polymer (L-valine-valine and polyoxyethylene40 stearate conjugate, PEG Mw:2000).


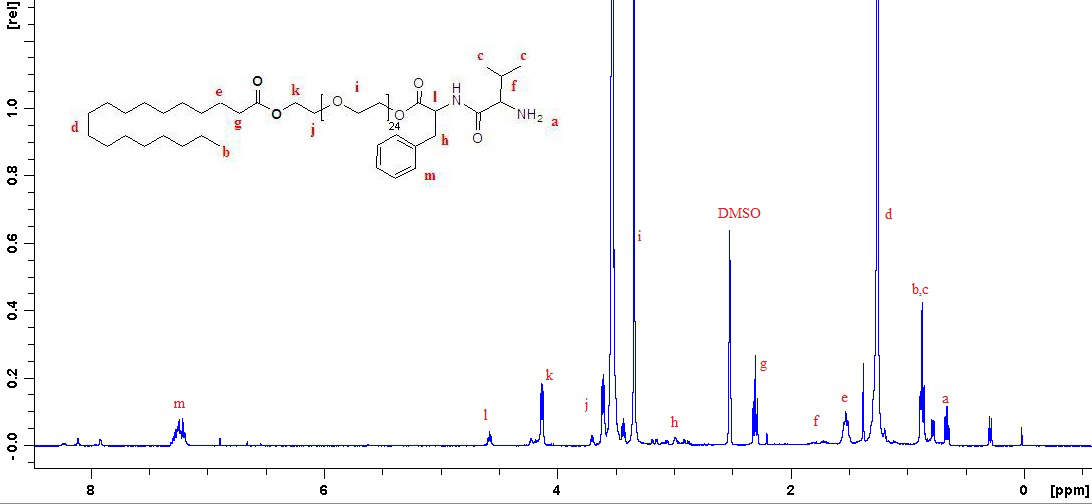


Figure S8. 1H NMR spectrum of NSPP1000 polymer (L-valine-phenylalanine and polyoxyethylene25 stearate conjugate, PEG Mw:1000).


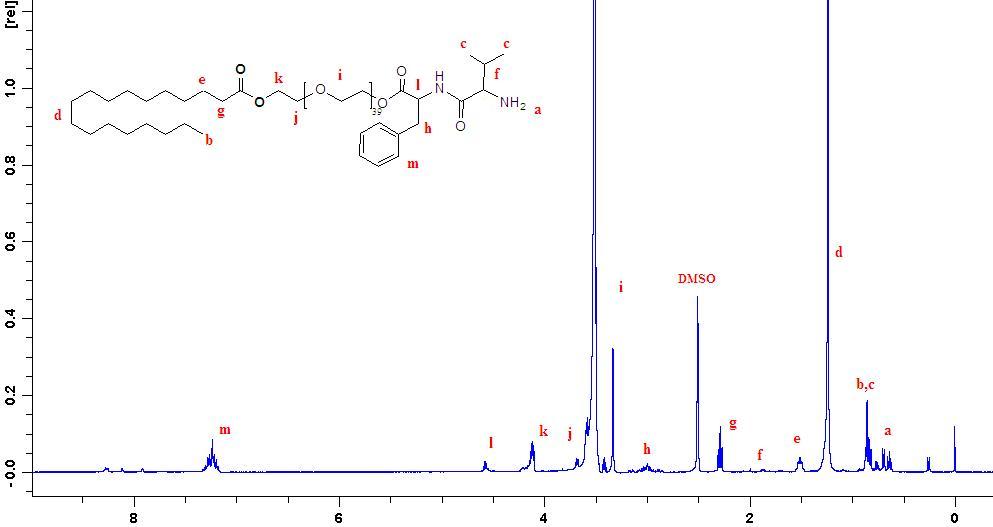


Figure S9. 1H NMR spectrum of NSPP2000 polymer (L-valine-phenylalanine and polyoxyethylene40 stearate conjugate, PEG Mw:2000).


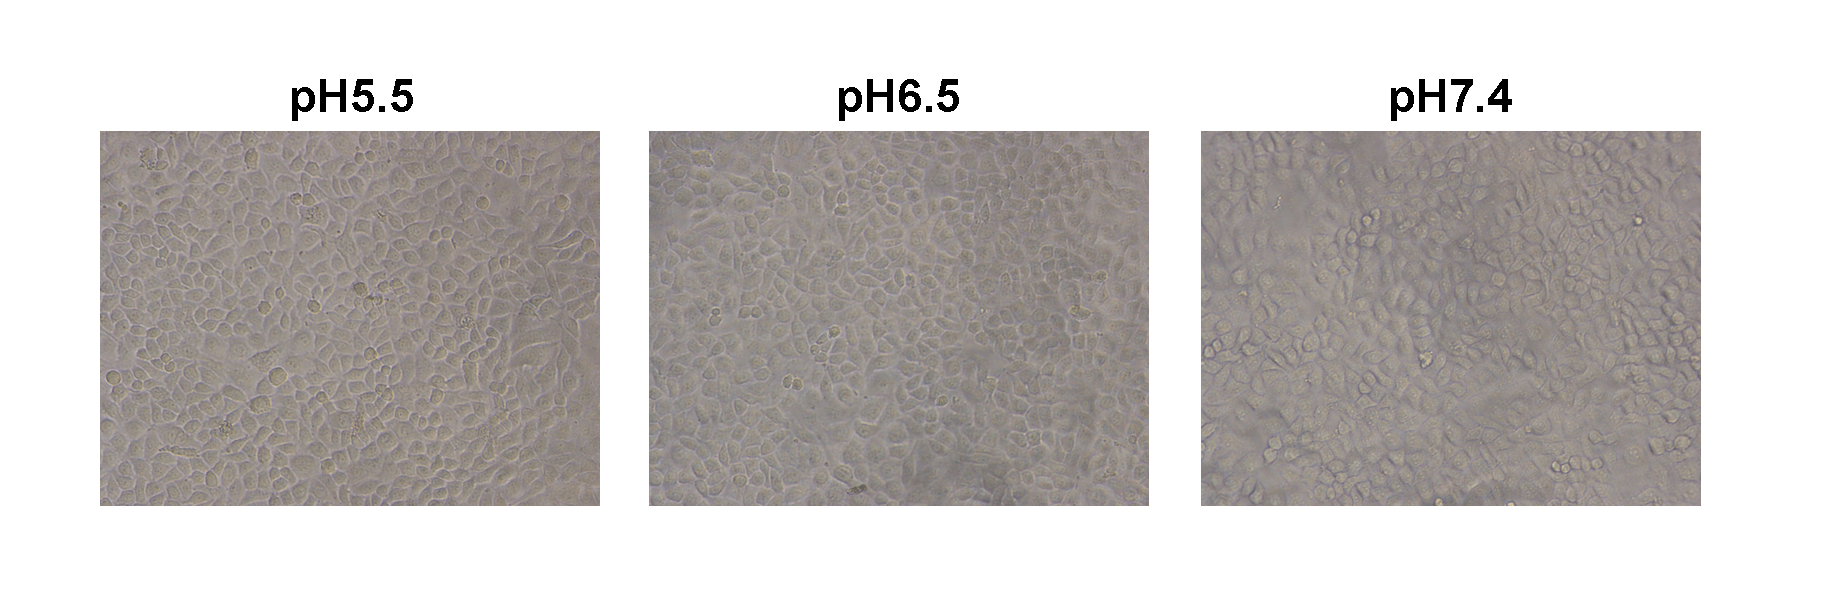


Figure S10. Cell morphology monitored by microscope under different pH conditions (pH 5.5, 6.5 and 7.4) after the experiments (Original magnification: ×100).


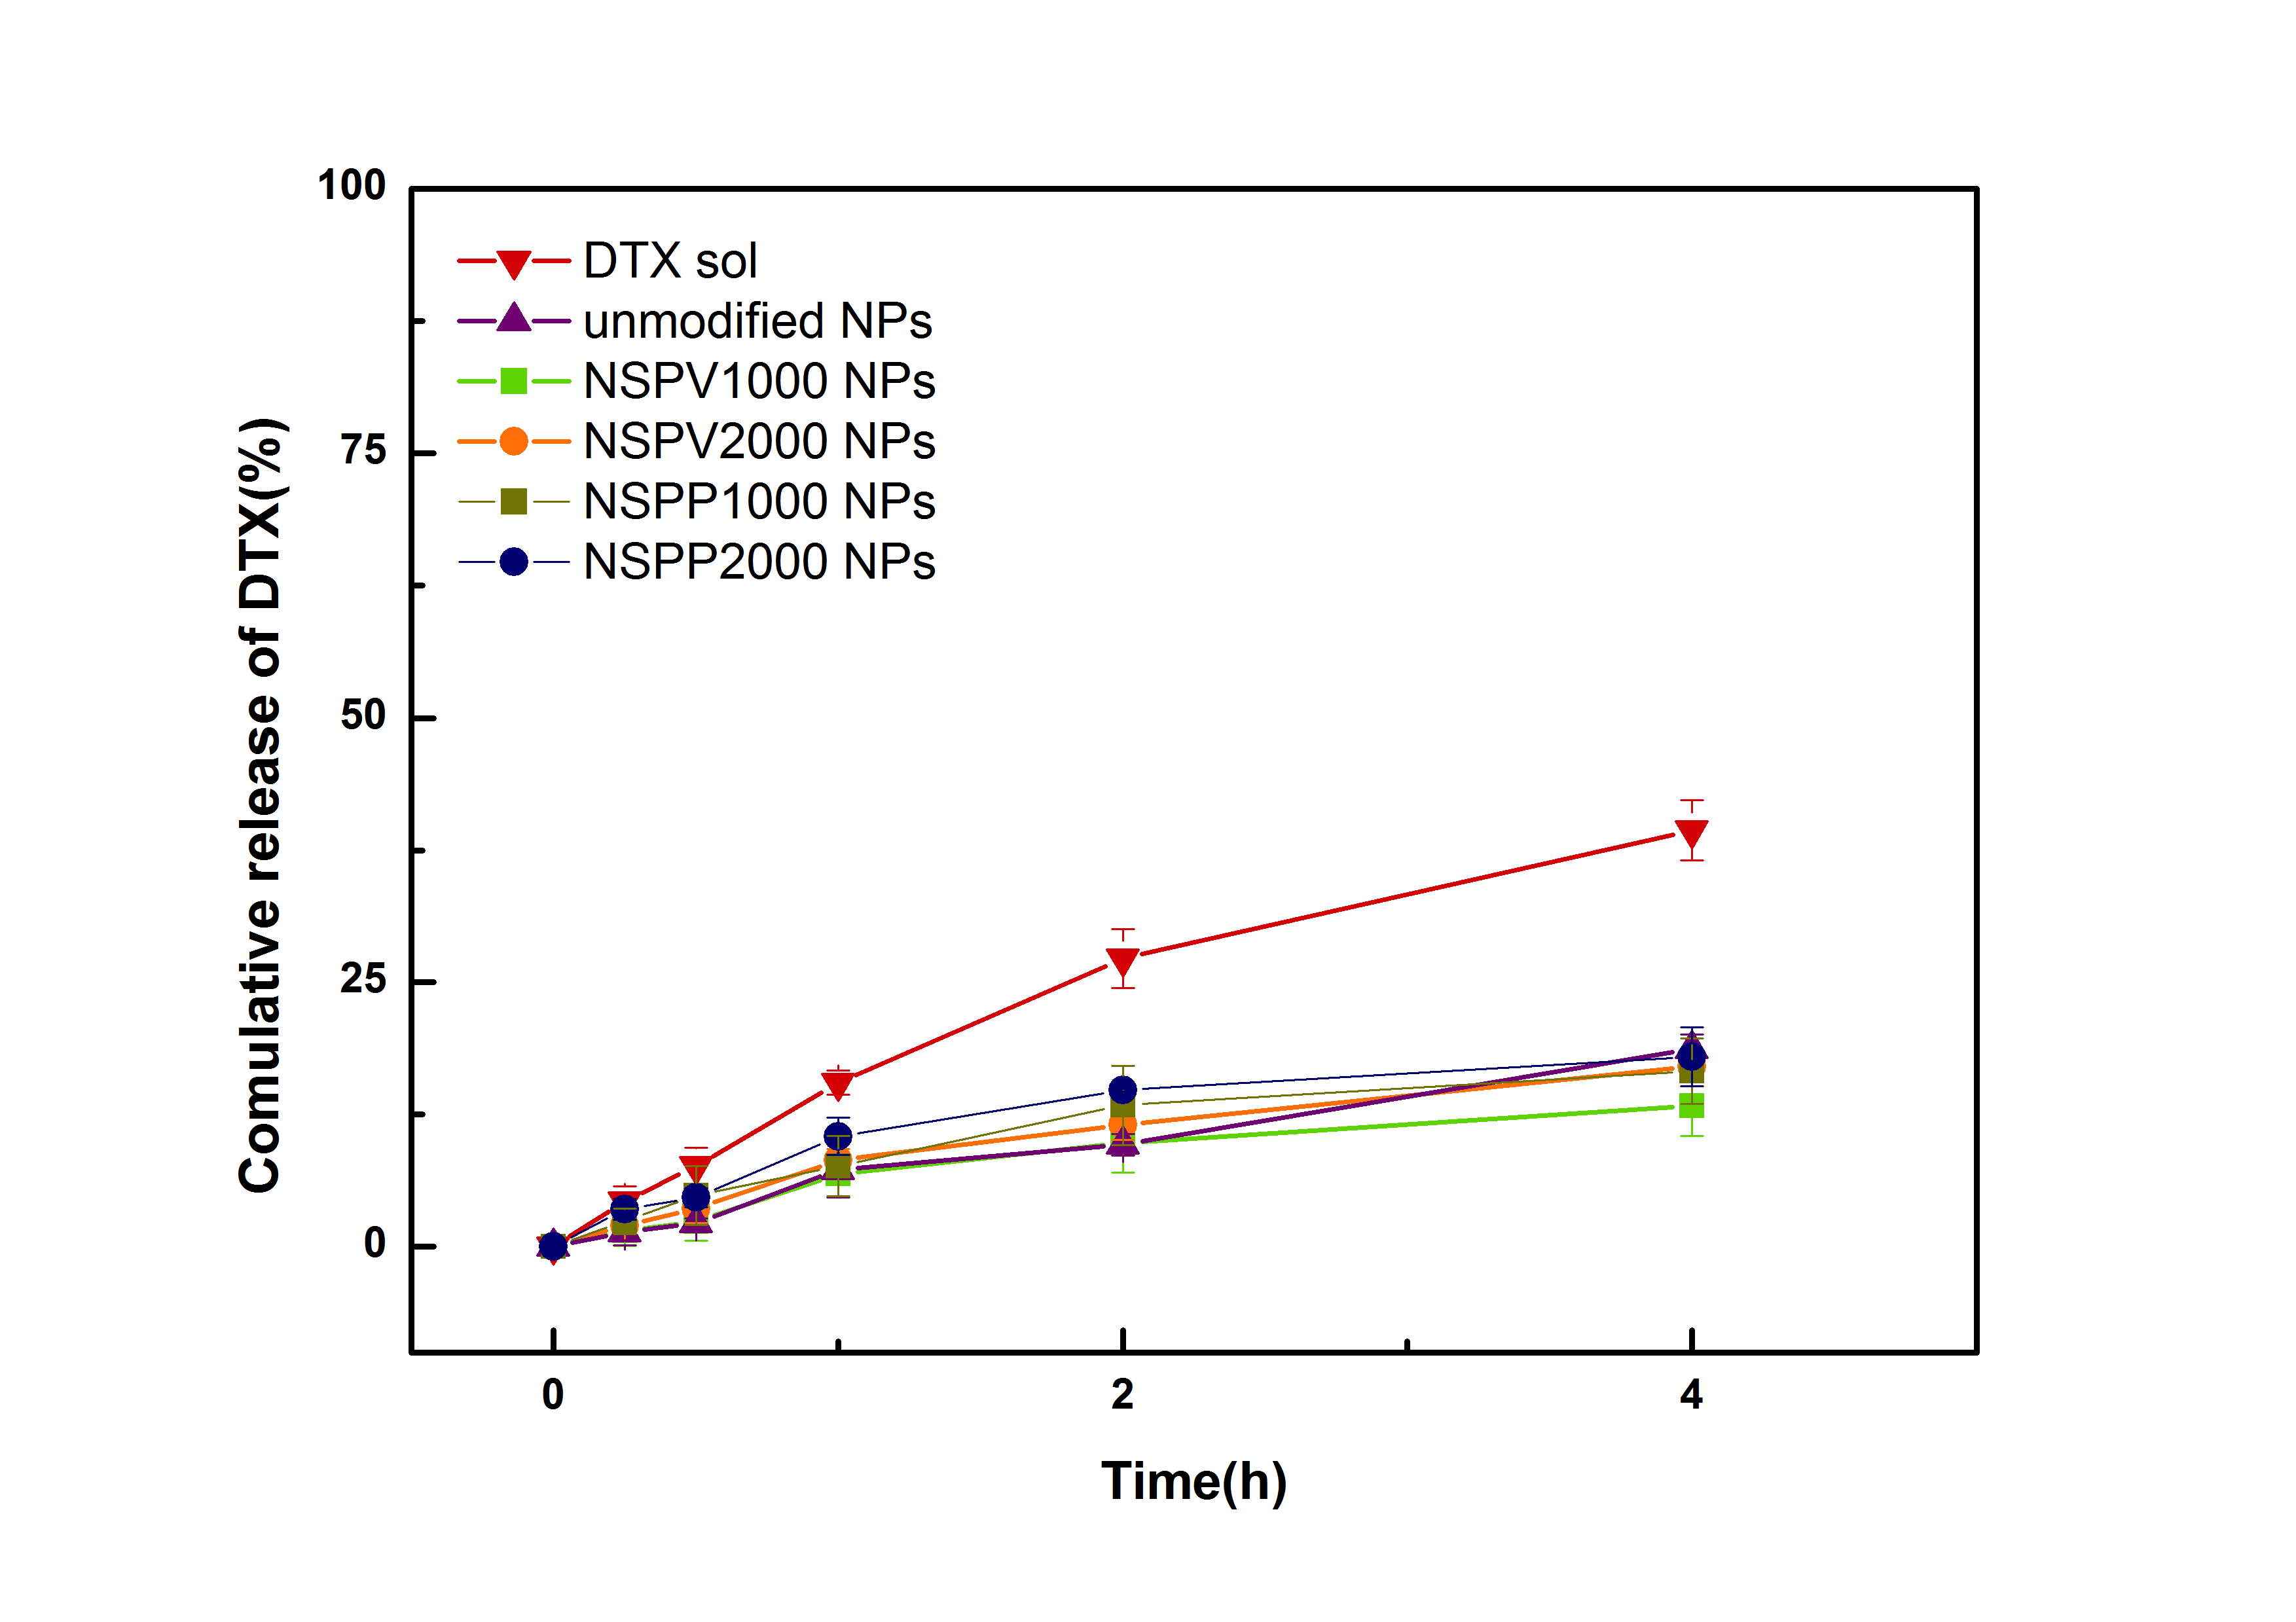


Figure S11. *In vitro* release of DTX solution, DTX-loaded unmodified NPs, NSPV1000 NPs, NSPV2000 NPs, NSPP1000 NPs and NSPP2000 NPs in pH 1.0 medium for 4 h. (Data are shown as mean ± SD, n=3).


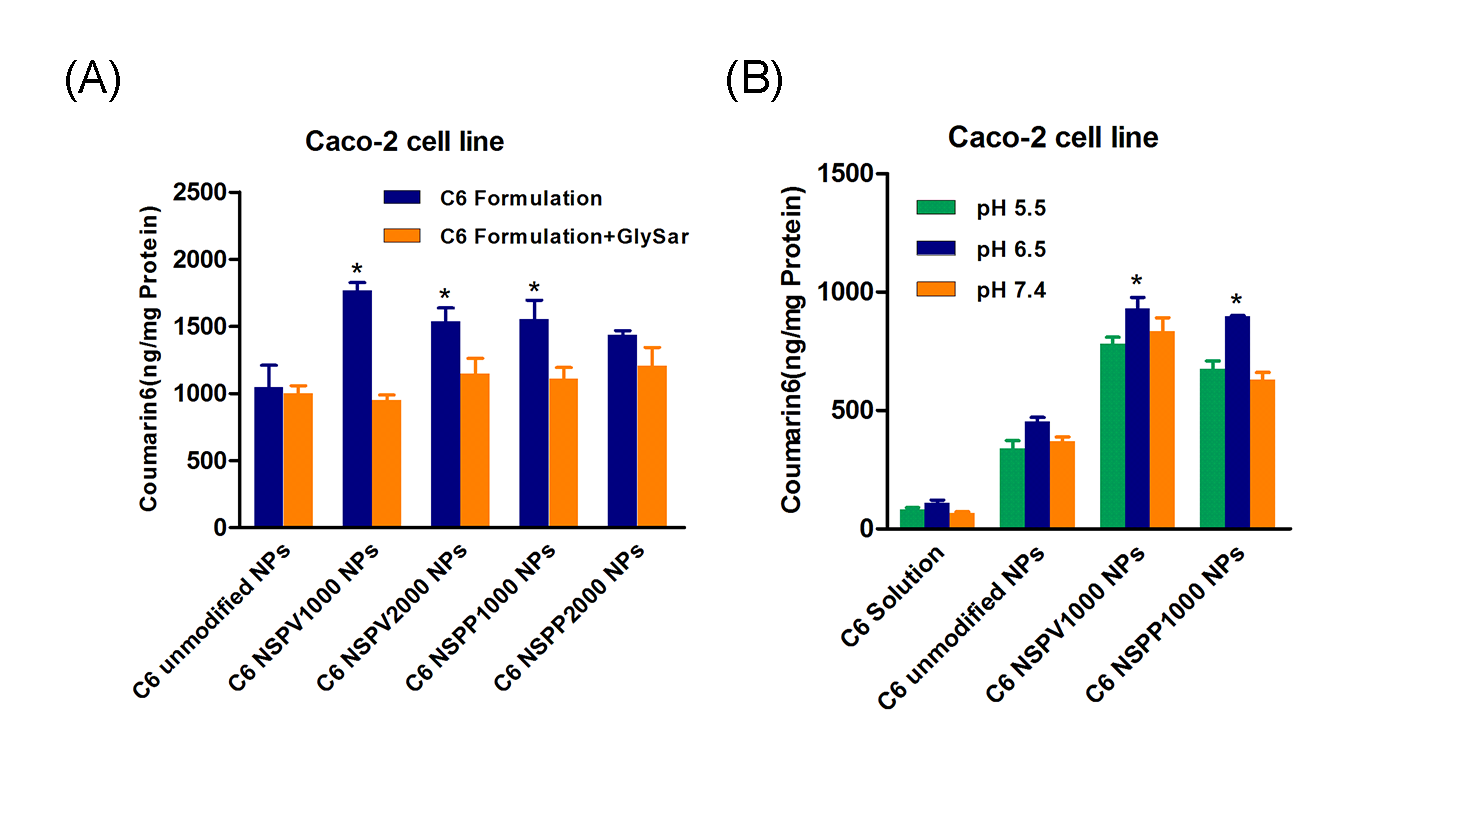


Figure S12. (A) Competitive study in Caco-2 cells in the presence of typical substrate GlySar (GS); (B) Influence of proton in the culture medium on the cellular uptake of dipeptide modified NPs in Caco-2 cells.

Table S1. Physical characterizations of DTX-loaded NPs (n=3)

| NPs | Size (d.nm) | PDI | Zeta potential (mV) | DL (%) | EE (%) |
| --- | --- | --- | --- | --- | --- |
| Unmodified NPs | 159.7±4.9 | 0.046±0.028 | -4.05±0.25 | 5.01±0.35 | 92.45±1.52 |
| NSPV1000 NPs | 165.6±4.4 | 0.030±0.029 | -2.79±0.16 | 5.58±0.25 | 89.90±0.53 |
| NSPV2000 NPs | 169.4±4.5 | 0.027±0.027 | -2.44±0.25 | 4.94±0.15 | 85.50±1.34 |
| NSPP1000 NPs | 167.8±5.6 | 0.016±0.016 | -3.77±0.24 | 5.46±0.34 | 88.57±1.57 |
| NSPP2000 NPs | 170.6±2.4 | 0.054±0.038 | -2.23±0.11 | 4.84±0.08 | 83.65±2.47 |

Table S2. Pharmacokinetic parameters of DTX solution and DTX-loaded NPs

| PK parameters | Cmax(ng/mL) | Tmax(h) | AUC0-24(ng×h/mL) | t1/2(h) | FR(100%) |
| --- | --- | --- | --- | --- | --- |
| DTX solution | 38.14±6.14 | 0.31±0.13 | 44.72±15.87 | 2.05±0.99 | 100 |
| Unmodified NPs | 24.53±16.84 | 1.60±0.89 | 100.67±33.88 | 5.25±2.42 | 225.11 |
| NSPV1000 NPs | 46.09±19.53 | 1.75±1.50 | 196.15±30.55 | 10.58±3.28 | 438.62 |
